# Supplementary material for: Barriers and enablers to managing challenging behaviours after traumatic brain injury in the acute hospital setting: a qualitative study
Source: Springer Nature journal article supplement (doi:10.1186/s12913-023-10279-z), 2023-11-16
Supplement: MOESM3 [file 26312884]

Supplementary File 3: Constructs of the i-PARIHS implementation framework utilised for data collection, data analysis and mapped themes.

| Constructs of i-PARIHS framework                                                    | Focus group questions relating to constructs of i-PARIHS framework                                                                                                                                                                   | Data analysis                                                               | Themes identified as barriers and enablers mapped to characteristics of i-PARIHS constructs        |
|-------------------------------------------------------------------------------------|--------------------------------------------------------------------------------------------------------------------------------------------------------------------------------------------------------------------------------------|-----------------------------------------------------------------------------|----------------------------------------------------------------------------------------------------|
| <p><b>Innovation</b></p> <p>Evidence for TBI behaviour management</p>               | <p>Focus group questions relating to:</p> <ul style="list-style-type: none"> <li>• Current evidence and guideline recommendations</li> <li>• Relevance of the evidence to the acute context</li> </ul>                               | <p><b>Inductive-deductive coding and mapping to i-PARIHS constructs</b></p> | <p>Innovation Barrier:</p> <p>Limited evidence to inform clinical decision making</p>              |
| <p><b>Recipients</b></p> <p>Staff providing care and patients receiving care</p>    | <p>Focus group questions relating to:</p> <ul style="list-style-type: none"> <li>• Staff skills and knowledge</li> <li>• Confidence in decision making</li> </ul>                                                                    |                                                                             | <p>Recipient Barrier:</p> <p>Lack of experienced multidisciplinary staff with practical skills</p> |
| <p><b>Context</b></p> <p>Ward level, organisational, and policy characteristics</p> | <p>Focus group questions relating to:</p> <ul style="list-style-type: none"> <li>• Hospital environment and resources</li> <li>• Leadership, feeling valued, teamwork, culture</li> <li>• Workforce, strategic priorities</li> </ul> |                                                                             | <p>Context Barrier:</p> <p>Hospital systems and resources</p>                                      |
|                                                                                     |                                                                                                                                                                                                                                      |                                                                             | <p>Recipients and Context Enabler:</p> <p>Consistent, person-centred care</p>                      |
|                                                                                     |                                                                                                                                                                                                                                      |                                                                             | <p>Recipient Enabler:</p> <p>Supportive teams</p>                                                  |
